# Supplementary figures and images for: Investigation of changes regularities in the valence state during the formation of supported palladium–bismuth nanoparticles using XPS
Source: Royal Society of Chemistry journal article supplement (doi:10.1039/d2nj03651g), 2022-11-23

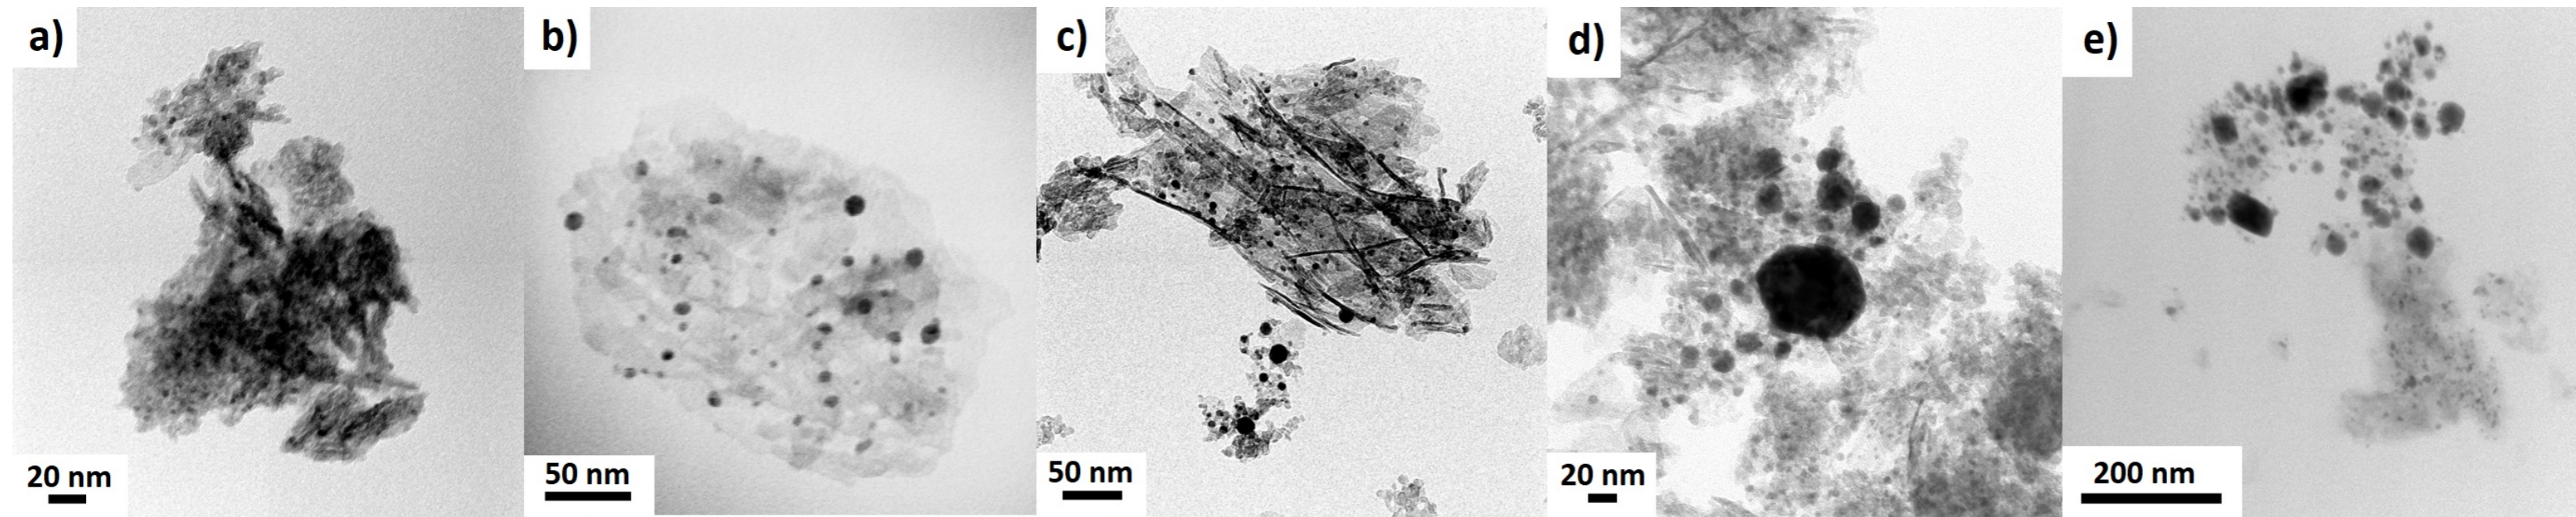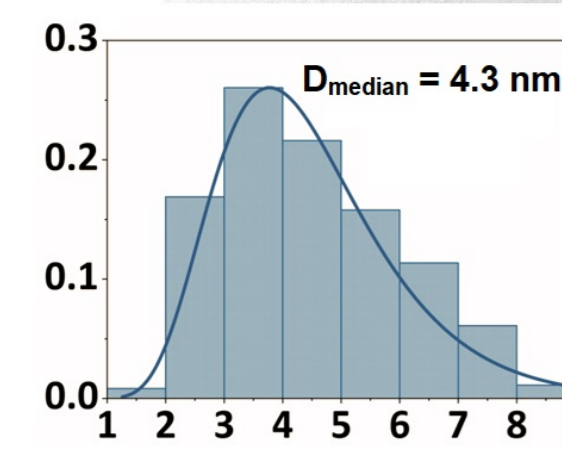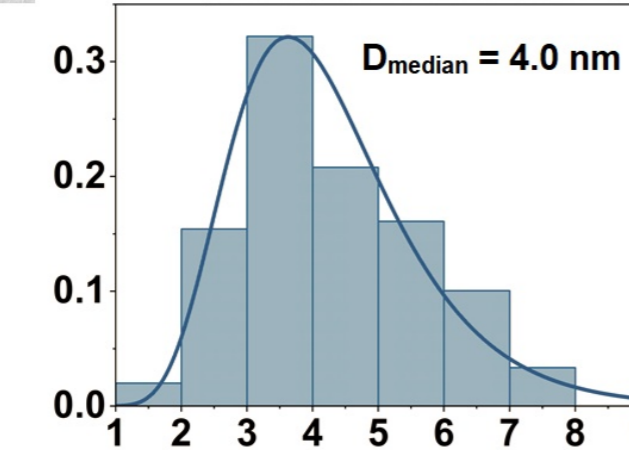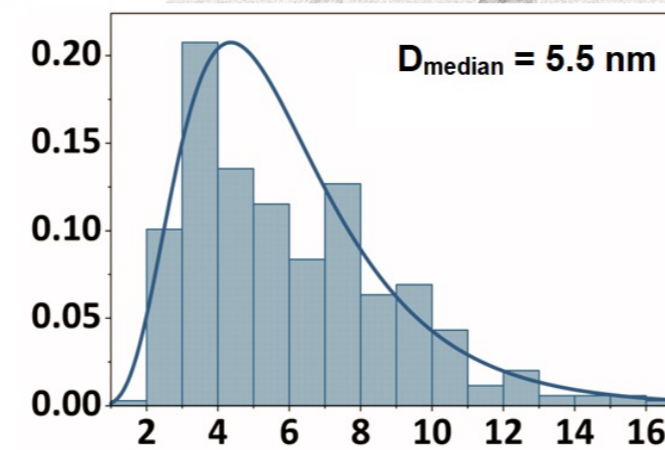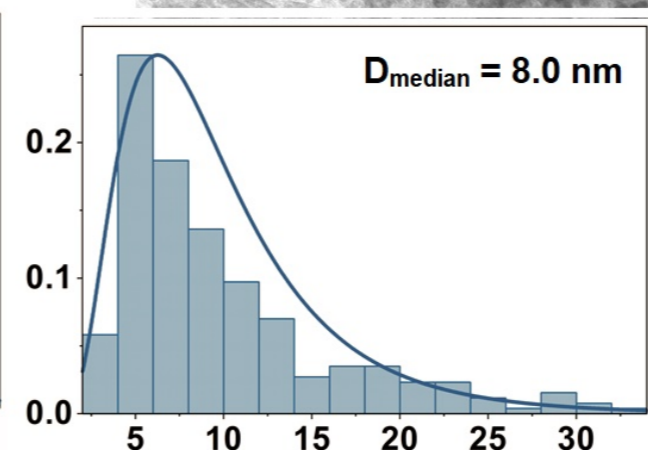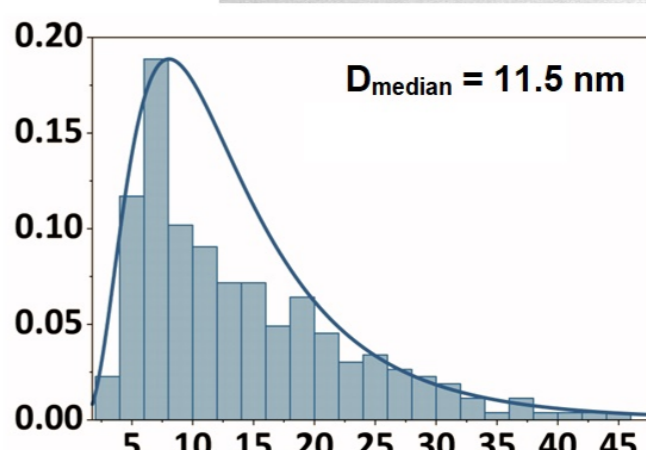

Supplement: d2nj03651g2.pdf [file d2nj03651g2.pdf]

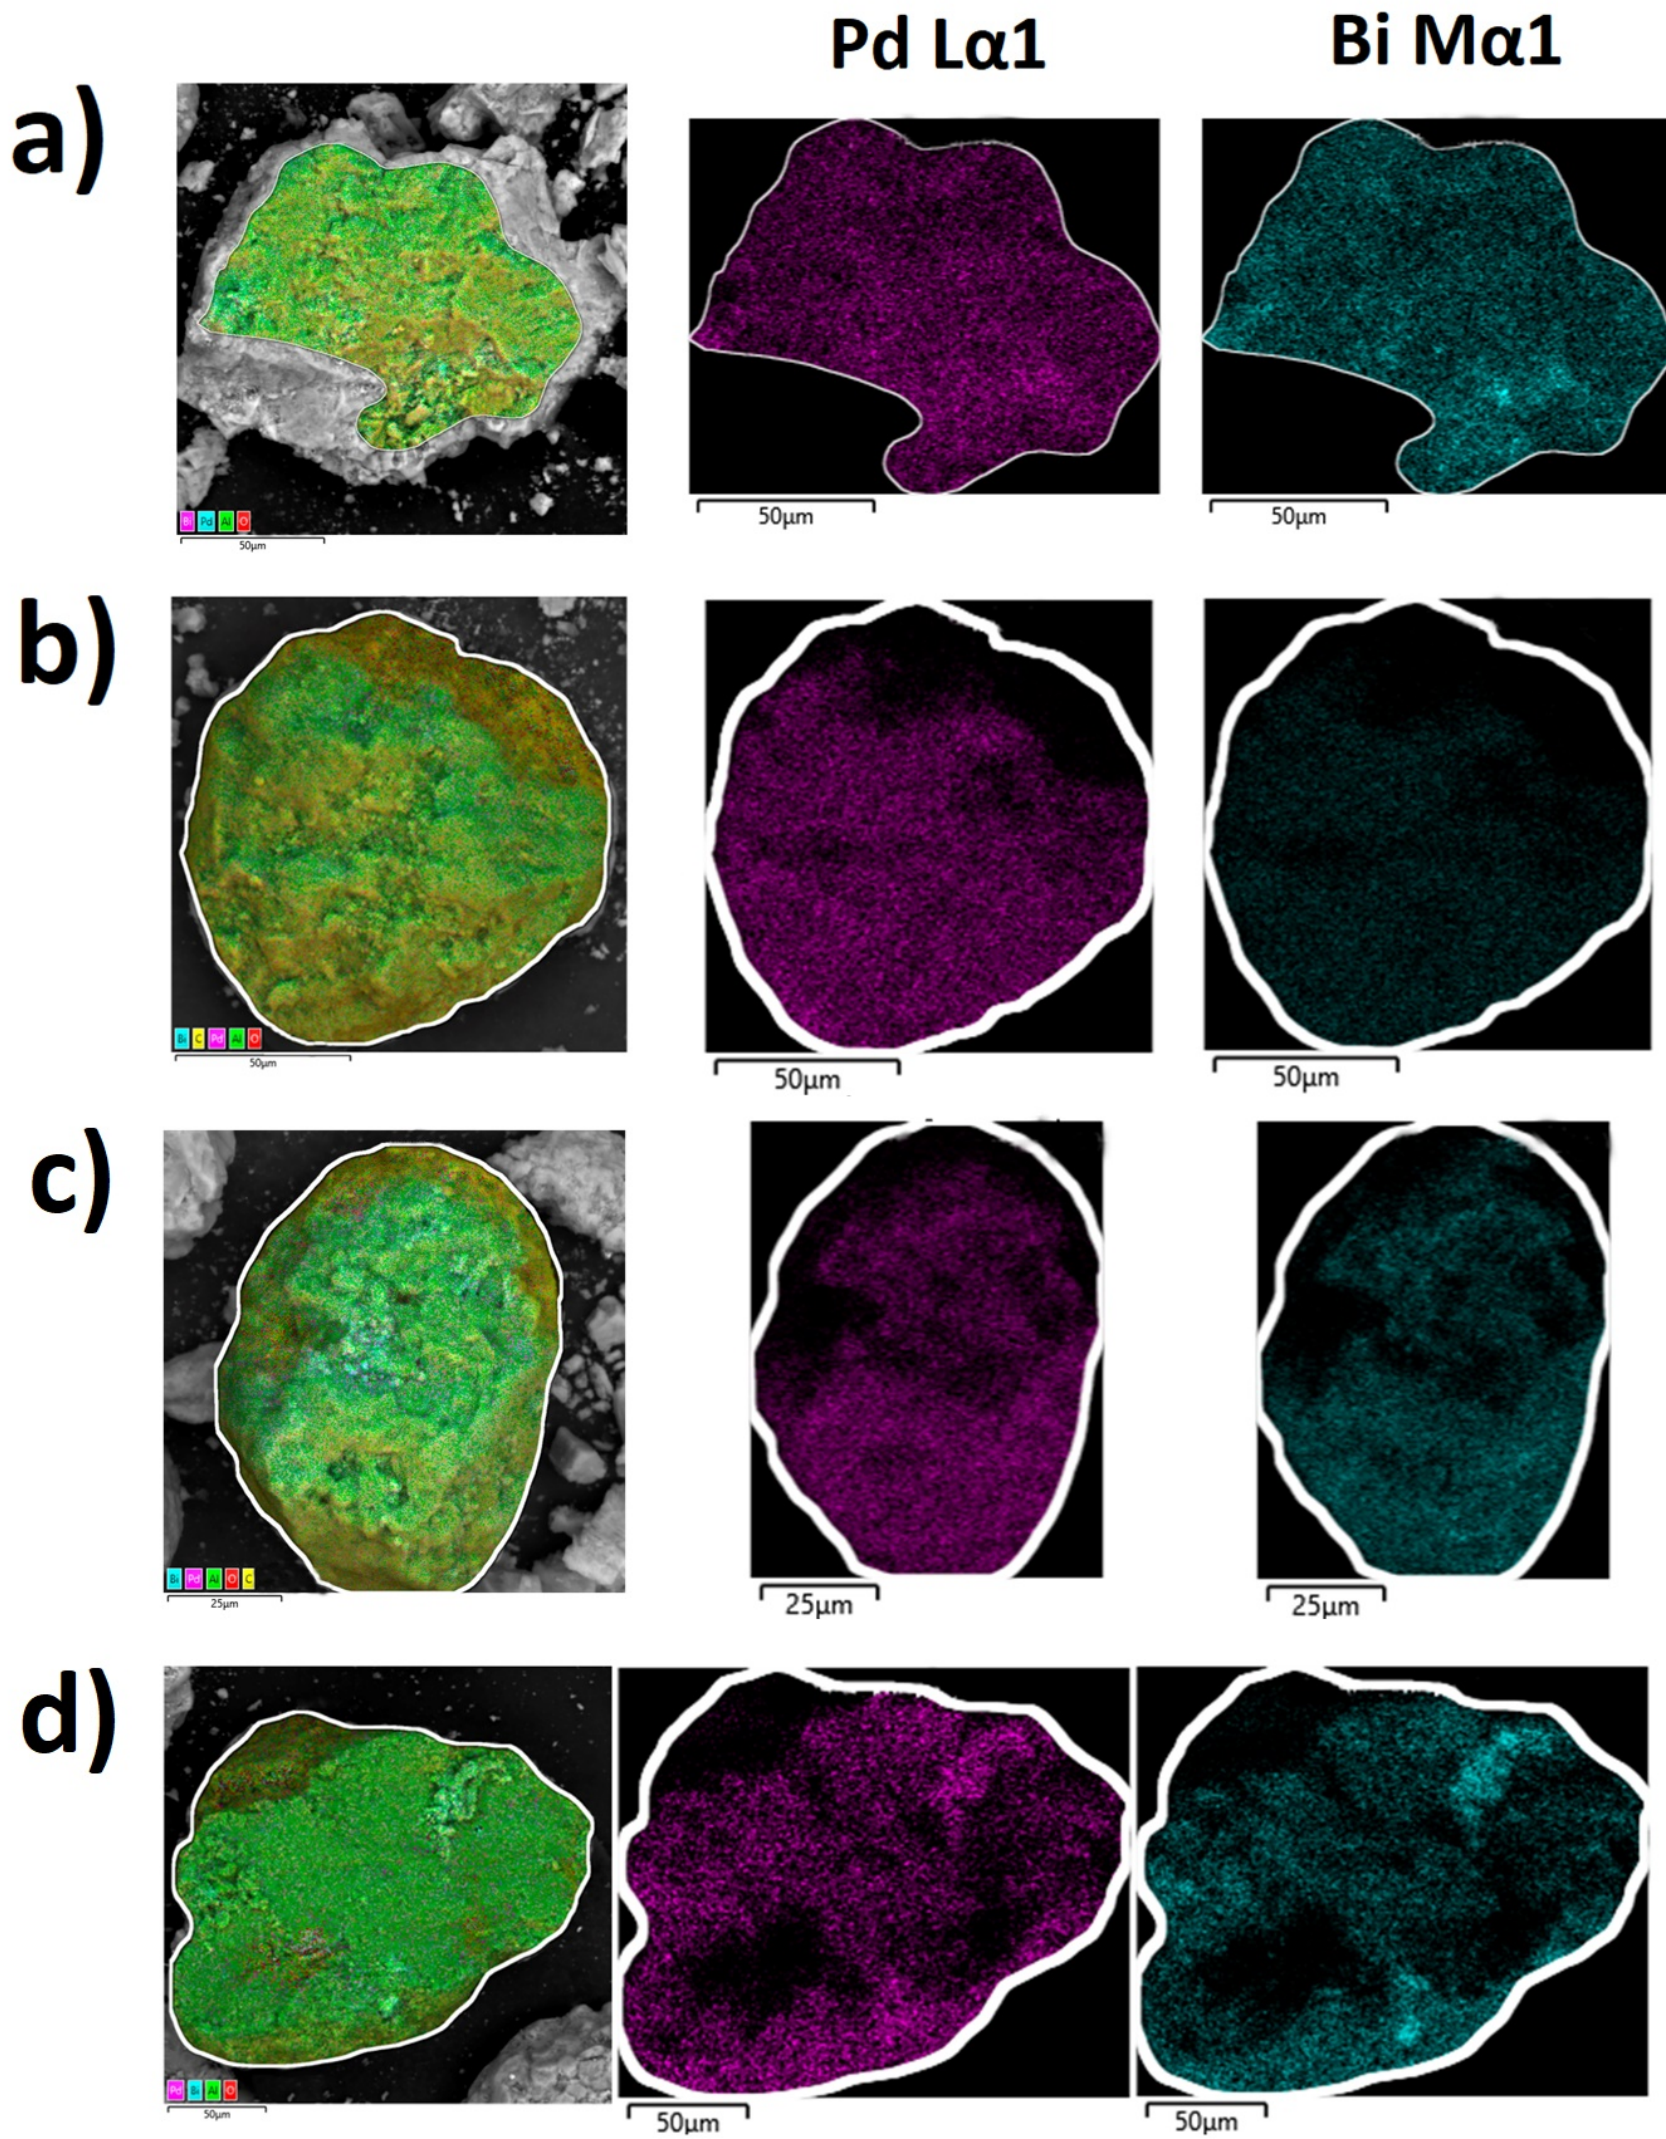

Supplement: d2nj03651g3.pdf [file d2nj03651g3.pdf]
